# Supplementary material for: Enhanced Homing Technique of Mesenchymal Stem Cells Using Iron Oxide Nanoparticles by Magnetic Attraction in Olfactory-Injured Mouse Models
Source: PubMed Central journal article supplement (PMC5983763; doi:10.3390/ijms19051376), 2018-05-05
Supplement: ijms-19-01376-s002.pdf [file ijms-19-01376-s002.pdf]

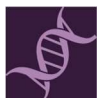

1 *Supplementary*

2 **Enhanced Homing Technique of Mesenchymal Stem**  
3 **Cells Using Iron Oxide Nanoparticles by Magnetic**  
4 **Attraction in Olfactory-Injured Mouse Models**

5 **Wan Su Yun** <sup>4,†</sup>, **Jin Sil Choi** <sup>1,2,†</sup>, **Hyun Mi Ju** <sup>1,2</sup>, **Min Hee Kim** <sup>1,2</sup>, **Seong Jin Choi** <sup>3</sup>, **Eun Seol Oh** <sup>4</sup>,  
6 **Young Joon Seo** <sup>1,2,\*</sup> and **Jaehong Key** <sup>4,\*</sup>

7 <sup>1</sup> Laboratory of Smile Snail, Yonsei University Wonju College of Medicine, Wonju, Korea

8 <sup>2</sup> Department of Otorhinolaryngology, Yonsei University Wonju College of Medicine, Wonju, Korea;  
9 towtowtow92@naver.com (J.S.C.); skdi1082@naver.com (H.M.J.); mini.alice11234@gmail.com (M.H.K.)

10 <sup>3</sup> Department of Obstetrics and Gynecology, Yonsei University Wonju College of Medicine, Wonju, Korea;  
11 choisj@yonsei.ac.kr

12 <sup>4</sup> Department of Biomedical Engineering, Yonsei University Wonju College of Medicine, Wonju, Korea;  
13 ip9801@naver.com (W.S.Y.); marchman10@hanmail.net (E.S.O.)

14 \* Correspondence: okas2000@hanmail.net (Y.J.S.); jkey@yonsei.ac.kr (J.K.);  
15 Tel.: +82-33-741-0644 (Y.J.S.); +82-33-760-2857 (J.K.)

16 † Contributed equally to this work.  
17

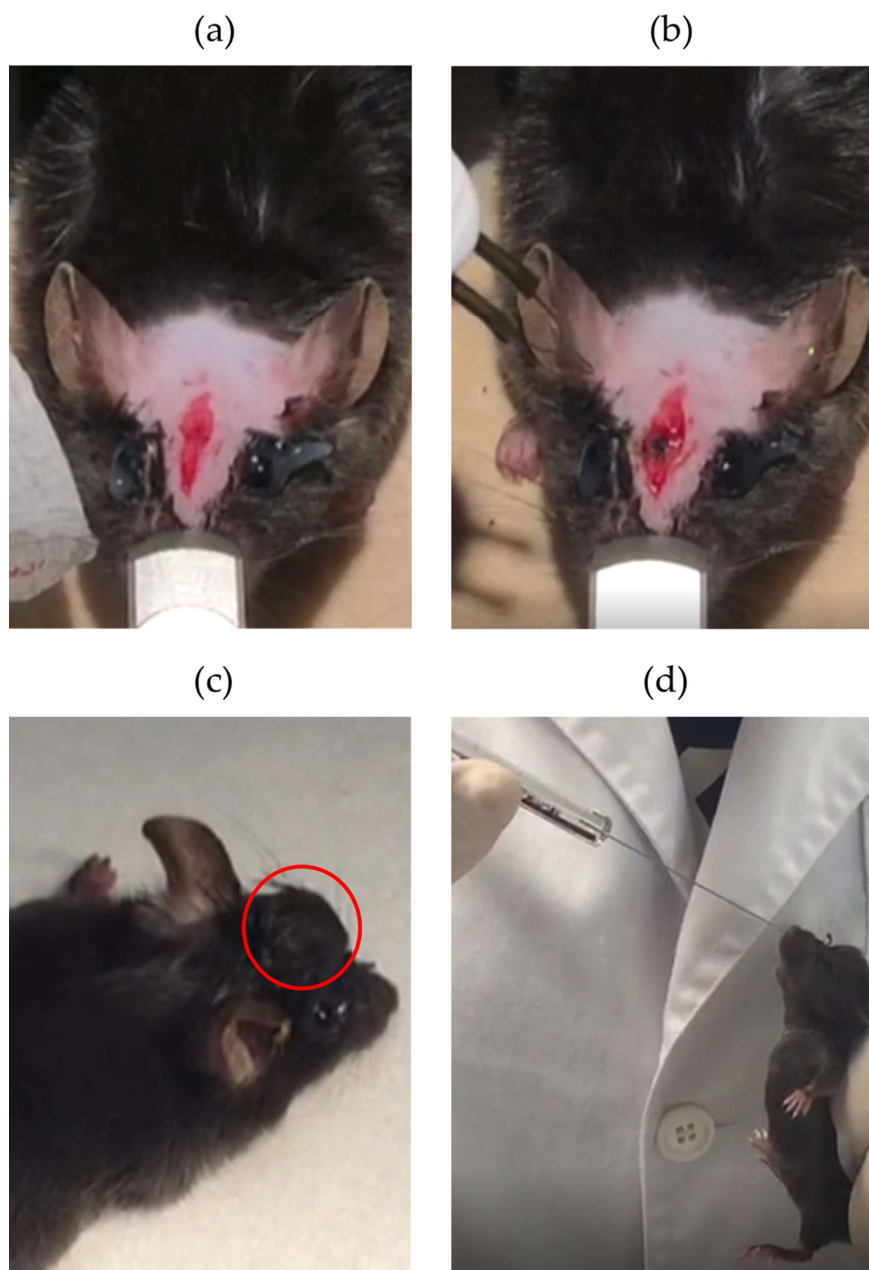

18  
19  
20  
21  
22  
23  
24  
25  
26  
27  
28  
29  
30  
31

**Figure S1.** Procedures for migration of magnetized MSCs with IRBs in olfactory-injured mouse models. (a) After exposure of the scalp bone to remove the skin covering the skull with scissors, a 2-mm cranial window was opened on the exposed bone. (b) Bipolar coagulation was used with a 1-mm depth for 100 ms on only one side of the olfactory bulb. (c) The 5-mm cuboidal magnet was inserted into the scalp, and then the scalp was sutured. (d) Injection of magnetized MSCs into olfactory-injured mouse models was performed with a 50- $\mu$ L Hamilton syringe via each nostril.

Damaged cells in the olfactory mouse model were confirmed by H&E staining and immunohistochemistry results of SDF-1 chemokines secreted from the damaged cells (Figure S2). H&E staining results clearly revealed the destructed left olfactory bulb compared to the right bulb (Figure S2A). The damaged site also showed high secretion of SDF-1 in immunohistochemistry analysis (Figure S2B). This showed that the olfactory mouse model was well-prepared.

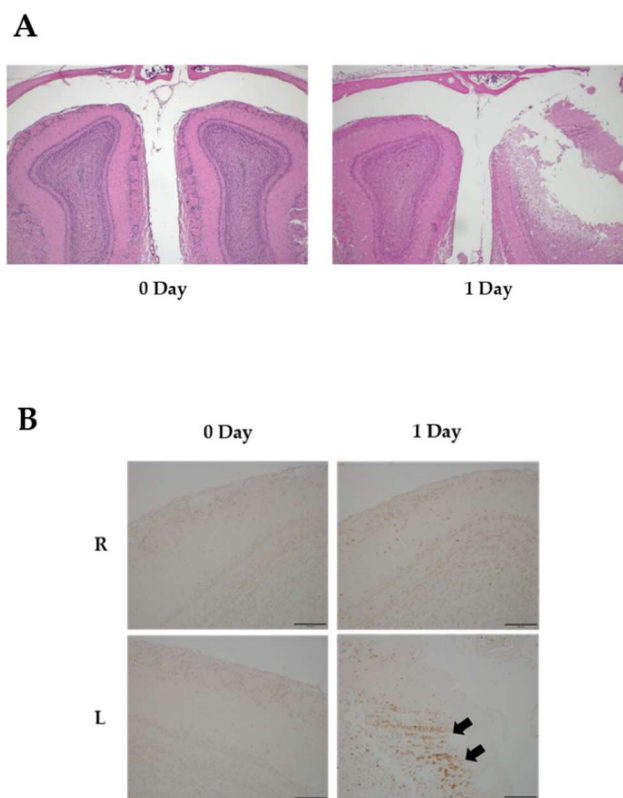

32

33

34

35

36

**Figure S2.** H&E staining and SDF-1 expression in olfactory injured mouse models. **(A)** Destruction of left olfactory bulbs after one day was observed via H&E staining. **(B)** Distribution of SDF-1 chemokines (black arrows) secreted from damaged cells around the injured area was confirmed by immunohistochemistry.
